# Supplementary material for: iTRAQ-based quantitative proteomic analysis for identification of biomarkers associated with emodin against severe acute pancreatitis in rats
Source: Royal Society of Chemistry journal article supplement (doi:10.1039/c6ra16446c), 2016-01-01
Supplement: c6ra16446c1.pdf [file c6ra16446c1.pdf]

## Supplemental Materials

**Supplemental Table 1. The differentially expressed proteins from rat pancreas identified by proteomics (SAP vs. SO)**

| No. | Protein name                                                                | Gene name | ratio | P value  |
|-----|-----------------------------------------------------------------------------|-----------|-------|----------|
| 1   | Metallothionein                                                             | Mt1m      | 3.35  | 6.34E-07 |
| 2   | Neutrophil antibiotic peptide NP-2                                          | Defa      | 3.3   | 8.39E-07 |
| 3   | Ilf2 protein                                                                | Ilf2      | 3.18  | 1.75E-06 |
| 4   | Numb isoform o/o                                                            | rCG       | 3.12  | 2.73E-06 |
| 5   | Lysozyme                                                                    | Lyz2      | 3.01  | 5.63E-06 |
| 6   | Glucagon                                                                    | Gcg       | 2.89  | 1.17E-05 |
| 7   | Serine protease HTRA1                                                       | Htra1     | 2.75  | 2.97E-05 |
| 8   | Alpha 2 macroglobulin cardiac isoform (Fragment)                            |           | 2.75  | 2.97E-05 |
| 9   | Myosin IF (Predicted)                                                       | Myo1f     | 2.65  | 5.53E-05 |
| 10  | Neuroendocrine secretory protein 55                                         | Gnas      | 2.61  | 7.60E-05 |
| 11  | Matrix metalloproteinase 8                                                  | Mmp8      | 2.57  | 9.47E-05 |
| 12  | Protein Tnks1bp1                                                            | Tnks1bp1  | 2.53  | 1.22E-04 |
| 13  | Alpha-parvin                                                                | Parva     | 2.47  | 1.78E-04 |
| 14  | C4b-binding protein alpha chain                                             | C4bpa     | 2.42  | 2.53E-04 |
| 15  | Protein KTI12 homolog                                                       | Kti12     | 2.41  | 2.74E-04 |
| 16  | Protein Rab11fip5                                                           | Rab11fip5 | 2.41  | 2.84E-04 |
| 17  | Protein Mcpt113                                                             | Mcpt113   | 2.33  | 4.43E-04 |
| 18  | Phospholipase B-like 1                                                      | Plbd1     | 2.33  | 4.76E-04 |
| 19  | Aldehyde dehydrogenase (NAD), cytosolic (Fragments)                         |           | 2.32  | 4.93E-04 |
| 20  | Protein Dpy19l2                                                             | Dpy19l2   | 2.3   | 5.68E-04 |
| 21  | Regenerating islet-derived 3 alpha, isoform CRA_a                           | Reg3a     | 2.27  | 6.74E-04 |
| 22  | 60S acidic ribosomal protein P1                                             | Rplp1     | 2.26  | 7.22E-04 |
| 23  | Serum albumin                                                               | Alb       | 2.25  | 7.98E-04 |
| 24  | Ribonuclease 4                                                              | Rnase4    | 2.24  | 8.25E-04 |
| 25  | Cct-5 protein (Fragment)                                                    | Cct5      | 2.24  | 8.52E-04 |
| 26  | Protein S100-A9                                                             | S100a9    | 2.22  | 9.71E-04 |
| 27  | Creatine kinase M-type                                                      | Ckm       | 2.21  | 1.00E-03 |
| 28  | Protein Larp4b                                                              | Larp4b    | 2.18  | 1.25E-03 |
| 29  | Coagulation factor IX                                                       | F9        | 2.17  | 1.29E-03 |
| 30  | Protein kinase C gamma type                                                 | Prkcg     | 2.15  | 1.55E-03 |
| 31  | Angiopoietin-related protein 4                                              | Angptl4   | 2.14  | 1.65E-03 |
| 32  | ADP-ribosylation factor GTPase activating protein 1 brain isoform           | Arfgap1   | 2.11  | 1.91E-03 |
| 33  | Carboxylic ester hydrolase                                                  | Ache      | 2.11  | 2.02E-03 |
| 34  | Brain-specific angiogenesis inhibitor 1-associated protein 2-like protein 1 | Baiap2l1  | 2.09  | 2.27E-03 |
| 35  | Protein Retnlg                                                              | Retnlg    | 2.05  | 2.84E-03 |
| 36  | Eukaryotic translation initiation factor 2 subunit 1                        | Eif2a     | 2.03  | 3.34E-03 |

|    |                                                              |              |      |          |
|----|--------------------------------------------------------------|--------------|------|----------|
| 37 | Cytochrome b5                                                | Cyb5a        | 2.03 | 3.34E-03 |
| 38 | Clusterin                                                    | Clu          | 2.02 | 3.43E-03 |
| 39 | Condensin complex subunit 1                                  | Ncapd2       | 2.02 | 3.43E-03 |
| 40 | Protein Cyfip2                                               | Cyfip2       | 2.02 | 3.52E-03 |
| 41 | Regenerating islet-derived protein 3-beta                    | Reg3b        | 2.01 | 3.81E-03 |
| 42 | Protein Lrp1b                                                | Lrp1b        | 1.97 | 5.05E-03 |
| 43 | Transcription factor BTF3                                    | Btf3         | 1.96 | 5.05E-03 |
| 44 | Protein RGD1304963                                           | RGD1304963   | 1.96 | 5.18E-03 |
| 45 | Brain-specific angiogenesis inhibitor 1-associated protein 2 | Baiap2       | 1.95 | 5.71E-03 |
| 46 | Apolipoprotein B-100                                         | Apob         | 1.92 | 6.60E-03 |
| 47 | Protein Edrf1                                                | Edrf1        | 1.92 | 6.76E-03 |
| 48 | Protein Sh3d19                                               | Sh3d19       | 1.91 | 7.09E-03 |
| 49 | Choline-phosphate cytidylyltransferase A                     | Pcyl1a       | 1.91 | 7.09E-03 |
| 50 | Uncharacterized protein                                      |              | 1.89 | 8.14E-03 |
| 51 | Myomegalin                                                   | Pde4dip      | 1.89 | 8.33E-03 |
| 52 | Immunoglobulin joining chain                                 | Igj          | 1.86 | 9.75E-03 |
| 53 | Protein Rab30                                                | Rab30        | 1.86 | 9.97E-03 |
| 54 | Protein Cobll1                                               | Cobll1       | 1.85 | 1.04E-02 |
| 55 | Apolipoprotein A-II                                          | Apoa2        | 1.85 | 1.06E-02 |
| 56 | Phosphatidylinositol 3-kinase regulatory subunit alpha       | Pik3r1       | 1.85 | 1.09E-02 |
| 57 | Elastase 3B, pancreatic (Predicted), isoform CRA_b           | Cela3b       | 1.84 | 1.09E-02 |
| 58 | Aa1249                                                       | Crp          | 1.84 | 1.11E-02 |
| 59 | CDK5 regulatory subunit-associated protein 2                 | Cdk5rap2     | 1.83 | 1.16E-02 |
| 60 | Charged multivesicular body protein 4c                       | Chmp4c       | 1.82 | 1.26E-02 |
| 61 | Hook homolog 1 (Drosophila) (Predicted)                      | Hook1        | 1.82 | 1.26E-02 |
| 62 | Transcriptional activator protein Pur-beta                   | Purb         | 1.82 | 1.26E-02 |
| 63 | TSC22 domain family protein 4                                | Tsc22d4      | 1.8  | 1.43E-02 |
| 64 | Syntaxin-binding protein 1                                   | Stxbp1       | 1.8  | 1.43E-02 |
| 65 | Anionic trypsin-1                                            | Prss1        | 1.8  | 1.46E-02 |
| 66 | Guanine nucleotide-binding protein subunit gamma             | Gng12        | 1.8  | 1.46E-02 |
| 67 | Protein LOC100364568                                         | LOC100364568 | 1.79 | 1.52E-02 |
| 68 | RCG27903, isoform CRA_b                                      | Zc3hav1      | 1.79 | 1.52E-02 |
| 69 | Interleukin enhancer-binding factor 3                        | Ilf3         | 1.78 | 1.65E-02 |
| 70 | Protein Mpo                                                  | Mpo          | 1.77 | 1.71E-02 |
| 71 | Guanine nucleotide-binding protein-like 1 (Fragment)         | Gnl1         | 1.77 | 1.75E-02 |
| 72 | Ac1873                                                       | Fga          | 1.77 | 1.75E-02 |
| 73 | Protein LOC680385                                            | LOC680385    | 1.77 | 1.75E-02 |
| 74 | Protein Myh1                                                 | Myh1         | 1.77 | 1.75E-02 |
| 75 | Thrombospondin 1                                             | Thbs1        | 1.77 | 1.75E-02 |
| 76 | Serum paraoxonase/arylesterase 1                             | Pon1         | 1.77 | 1.78E-02 |

|     |                                                             |              |      |          |
|-----|-------------------------------------------------------------|--------------|------|----------|
| 77  | Protein Vtn                                                 | Vtn          | 1.76 | 1.82E-02 |
| 78  | Protein S100-A8                                             | S100a8       | 1.76 | 1.85E-02 |
| 79  | Elastase 2, neutrophil (Predicted)                          | Elane        | 1.76 | 1.85E-02 |
| 80  | EGF-containing fibulin-like extracellular matrix protein 1  | Efemp1       | 1.76 | 1.85E-02 |
| 81  | GTP-binding protein G-alpha-i2 splice variant a (Fragment)  | Gnai2        | 1.76 | 1.89E-02 |
| 82  | RGD1562416 protein                                          | RGD1562416   | 1.75 | 1.96E-02 |
| 83  | Beta-enolase                                                | Eno3         | 1.74 | 2.08E-02 |
| 84  | Annexin A1                                                  | Anxa1        | 1.73 | 2.24E-02 |
| 85  | High affinity immunoglobulin epsilon receptor subunit gamma | Fcer1g       | 1.72 | 2.32E-02 |
| 86  | RGD1308009 protein (Fragment)                               | RGD1308009   | 1.72 | 2.41E-02 |
| 87  | Carbonyl reductase 3                                        | Cbr3         | 1.72 | 2.41E-02 |
| 88  | Thy-1 membrane glycoprotein                                 | Thy1         | 1.72 | 2.41E-02 |
| 89  | Protein Rreb1                                               | Rreb1        | 1.71 | 2.50E-02 |
| 90  | Carboxypeptidase A5                                         | Cpa5         | 1.71 | 2.59E-02 |
| 91  | RuvB-like 1                                                 | Ruvbl1       | 1.7  | 2.64E-02 |
| 92  | Glutamate receptor ionotropic, NMDA 2B                      | Grin2b       | 1.7  | 2.64E-02 |
| 93  | Protein Wnk2                                                | Wnk2         | 1.7  | 2.69E-02 |
| 94  | Protein AI314180                                            | AI314180     | 1.7  | 2.74E-02 |
| 95  | Uncharacterized protein                                     |              | 1.69 | 2.83E-02 |
| 96  | Cyclic AMP-dependent transcription factor ATF-3             | Atf3         | 1.69 | 2.88E-02 |
| 97  | Protein Cpne1                                               | LOC100910990 | 1.69 | 2.93E-02 |
| 98  | PAK-interacting exchange factor beta2-PIX                   | Arhgef7      | 1.68 | 2.99E-02 |
| 99  | Specifically androgen-regulated gene protein                | Sarg         | 1.68 | 3.09E-02 |
| 100 | Interferon-gamma-inducible GTPase Ifggd2 protein            | Irgm2        | 1.68 | 3.15E-02 |
| 101 | Proteasomal ubiquitin receptor ADRM1                        | Adrm1        | 1.67 | 3.20E-02 |
| 102 | SPARC-like 1 (Mast9, hevin), isoform CRA_a                  | Sparcl1      | 1.67 | 3.20E-02 |
| 103 | Protein LOC100361920                                        | LOC100361920 | 1.67 | 3.31E-02 |
| 104 | Inositol-trisphosphate 3-kinase C                           | Itpkc        | 1.66 | 3.42E-02 |
| 105 | Proteasome activator complex subunit 2                      | Psme2        | 1.65 | 3.60E-02 |
| 106 | Interleukin-6 receptor subunit beta                         | Il6st        | 1.65 | 3.72E-02 |
| 107 | Protein Mad111                                              | Mad111       | 1.65 | 3.72E-02 |
| 108 | Lithostathine                                               | Reg1         | 1.64 | 3.97E-02 |
| 109 | Protein Foxp4                                               | Foxp4        | 1.64 | 3.97E-02 |
| 110 | Neutrophilic granule protein (Predicted)                    | Ngp          | 1.63 | 4.10E-02 |
| 111 | Protein Ssfa2                                               | Ssfa2        | 1.63 | 4.10E-02 |
| 112 | Protein Lrba                                                | Lrba         | 1.63 | 4.17E-02 |
| 113 | Erythroid spectrin beta                                     | Sptb         | 1.63 | 4.24E-02 |
| 114 | Vesicle transport protein SEC20                             | Bnip1        | 1.62 | 4.31E-02 |
| 115 | AP-2 complex subunit alpha-2                                | Ap2a2        | 1.62 | 4.31E-02 |

|     |                                                                                |            |      |          |
|-----|--------------------------------------------------------------------------------|------------|------|----------|
| 116 | Nuclear envelope pore membrane protein POM 121                                 | Pom121     | 1.62 | 4.38E-02 |
| 117 | Protein RGD1562037                                                             | RGD1562037 | 1.61 | 4.73E-02 |
| 118 | Platelet glycoprotein Ib beta chain                                            | 5-Sep      | 1.61 | 4.73E-02 |
| 119 | Protein Baz1a                                                                  | Baz1a      | 1.61 | 4.73E-02 |
| 120 | Neutrophil antibiotic peptide NP-4                                             | Np4        | 1.6  | 4.88E-02 |
| 121 | Kinesin-like protein                                                           | Kif13b     | 1.6  | 4.88E-02 |
| 122 | Clathrin-assembly lymphoid myeloid leukemia protein                            | Picalm     | 1.6  | 4.88E-02 |
| 123 | Pre-eosinophil-associated ribonuclease-2                                       | Rnase2     | 1.6  | 4.96E-02 |
| 124 | Sorting nexin family member 27, isoform CRA_b                                  | Snx27      | 0.66 | 4.82E-02 |
| 125 | Mitochondrial dynamics protein MID51                                           | Mief1      | 0.66 | 4.82E-02 |
| 126 | Beta-hexosaminidase subunit alpha                                              | Hexa       | 0.66 | 4.79E-02 |
| 127 | AKT1 substrate 1 (Proline-rich) (Predicted), isoform CRA_d                     | Akt1s1     | 0.66 | 4.71E-02 |
| 128 | ADP-ribosylhydrolase like 2                                                    | Adprhl2    | 0.65 | 4.47E-02 |
| 129 | Tubulin gamma-1 chain                                                          | Tubg1      | 0.65 | 4.41E-02 |
| 130 | Protein Coa6                                                                   | Coa6       | 0.65 | 4.31E-02 |
| 131 | Palladin (Fragment)                                                            | Palld      | 0.65 | 4.25E-02 |
| 132 | ATP-dependent Clp protease proteolytic subunit                                 | Clpp       | 0.65 | 4.25E-02 |
| 133 | Probable bifunctional methylenetetrahydrofolate dehydrogenase/cyclohydrolase 2 | Mthfd2l    | 0.65 | 4.15E-02 |
| 134 | CD59 glycoprotein                                                              | Cd59       | 0.65 | 4.15E-02 |
| 135 | Hypothetical LOC498675                                                         | LOC498675  | 0.65 | 4.09E-02 |
| 136 | Protein LOC684681                                                              | LOC684681  | 0.65 | 4.06E-02 |
| 137 | UPF0598 protein C8orf82 homolog                                                |            | 0.65 | 4.03E-02 |
| 138 | Flotillin 1                                                                    | Flot1      | 0.65 | 4.00E-02 |
| 139 | Metastasis-associated gene family, member 2                                    | Mta2       | 0.64 | 3.88E-02 |
| 140 | ATP synthase protein 8                                                         | Mt-atp8    | 0.64 | 3.79E-02 |
| 141 | Uncharacterized protein                                                        |            | 0.64 | 3.76E-02 |
| 142 | Protein Vom2r31                                                                | Vom2r31    | 0.64 | 3.73E-02 |
| 143 | Protein Asmtl                                                                  | Asmtl      | 0.64 | 3.73E-02 |
| 144 | Otud4 protein (Fragment)                                                       | Otud4      | 0.64 | 3.65E-02 |
| 145 | Inositol polyphosphate 5-phosphatase OCRL-1                                    | Ocrl       | 0.64 | 3.57E-02 |
| 146 | Glucocorticoid receptor (Fragment)                                             | Nr3c1      | 0.64 | 3.54E-02 |
| 147 | Isocitrate dehydrogenase [NAD] subunit gamma 1, mitochondrial                  | Idh3g      | 0.64 | 3.51E-02 |
| 148 | ATP synthase subunit O, mitochondrial                                          | Atp5o      | 0.64 | 3.49E-02 |
| 149 | Acetyl-Coenzyme A dehydrogenase, medium chain                                  | Acadm      | 0.64 | 3.49E-02 |
| 150 | Protein Tmem30b                                                                | Tmem30b    | 0.64 | 3.41E-02 |
| 151 | Motile sperm domain-containing protein 1                                       | Mospd1     | 0.64 | 3.38E-02 |
| 152 | Protein RGD1564420                                                             | RGD1564420 | 0.64 | 3.31E-02 |
| 153 | Protein Plin4                                                                  | Plin4      | 0.64 | 3.26E-02 |
| 154 | Extracellular matrix protein 1                                                 | Ecm1       | 0.63 | 3.18E-02 |
| 155 | 40S ribosomal protein S29                                                      | Rps29      | 0.63 | 3.11E-02 |

|     |                                                                             |            |      |          |
|-----|-----------------------------------------------------------------------------|------------|------|----------|
| 156 | Sepiapterin reductase                                                       | Spr        | 0.63 | 3.04E-02 |
| 157 | Protein Rbx1                                                                | Rbx1       | 0.63 | 2.84E-02 |
| 158 | Protein RGD1305455                                                          | RGD1305455 | 0.63 | 2.77E-02 |
| 159 | Protein LOC681918                                                           | LOC686074  | 0.63 | 2.77E-02 |
| 160 | 60S ribosomal protein L29                                                   | Rpl29      | 0.63 | 2.77E-02 |
| 161 | Neutrophil gelatinase-associated lipocalin                                  | Lcn2       | 0.63 | 2.77E-02 |
| 162 | Alpha-centractin                                                            | Actr1a     | 0.63 | 2.69E-02 |
| 163 | 40S ribosomal protein S24                                                   | Rps24      | 0.62 | 2.61E-02 |
| 164 | Adenylosuccinate lyase                                                      | Adsl       | 0.62 | 2.59E-02 |
| 165 | COX15 homolog, cytochrome c oxidase assembly protein (Yeast), isoform CRA_a | Cox15      | 0.62 | 2.59E-02 |
| 166 | Protein Birc6                                                               | Birc6      | 0.62 | 2.57E-02 |
| 167 | Ubiquitin carboxyl-terminal hydrolase                                       | Usp47      | 0.62 | 2.57E-02 |
| 168 | Protein Sympk                                                               | Sympk      | 0.62 | 2.55E-02 |
| 169 | Zinc finger CCCH domain-containing protein 18                               | Zc3h18     | 0.62 | 2.53E-02 |
| 170 | Glucosamine-6-phosphate isomerase                                           | Gnpda1     | 0.62 | 2.45E-02 |
| 171 | Protein RGD1311805                                                          | RGD1311805 | 0.62 | 2.32E-02 |
| 172 | Histone H1.5                                                                | Hist1h1b   | 0.62 | 2.28E-02 |
| 173 | Endoplasmic reticulum metalloproteinase 1                                   | Ermp1      | 0.61 | 2.18E-02 |
| 174 | GPI transamidase component PIG-S                                            | Pigs       | 0.61 | 2.15E-02 |
| 175 | Lactamase, beta (Predicted)                                                 | Lactb      | 0.61 | 2.10E-02 |
| 176 | Thioredoxin reductase 2, isoform CRA_a                                      | Txnrd2     | 0.61 | 2.08E-02 |
| 177 | Bcas3 protein (Fragment)                                                    | Bcas3      | 0.61 | 2.05E-02 |
| 178 | Transporter 1 ATP-binding cassette sub-family B (Fragment)                  | Tap2       | 0.61 | 1.88E-02 |
| 179 | Protein prune homolog 2                                                     | Prune2     | 0.61 | 1.88E-02 |
| 180 | Protein Fundc2                                                              | Fundc2     | 0.61 | 1.81E-02 |
| 181 | Protein LOC100910882                                                        | Rbm39      | 0.6  | 1.74E-02 |
| 182 | Protein Hykk                                                                | Hykk       | 0.6  | 1.69E-02 |
| 183 | SUMO-activating enzyme subunit 1                                            | Sae1       | 0.6  | 1.68E-02 |
| 184 | L-2-hydroxyglutarate dehydrogenase (Predicted)                              | L2hgdh     | 0.6  | 1.67E-02 |
| 185 | DNA topoisomerase 1                                                         | Top1       | 0.6  | 1.59E-02 |
| 186 | NADH-ubiquinone oxidoreductase chain 5                                      | ND5        | 0.6  | 1.59E-02 |
| 187 | Golgi SNAP receptor complex member 1                                        | Gosr1      | 0.6  | 1.57E-02 |
| 188 | Epidermal fatty acid binding protein 5 (Fragment)                           | Fabp5      | 0.6  | 1.50E-02 |
| 189 | Protein Mospd2                                                              | Mospd2     | 0.6  | 1.50E-02 |
| 190 | 40S ribosomal protein S30                                                   | Fau        | 0.6  | 1.48E-02 |
| 191 | Tyrosine-protein kinase Lyn                                                 | Lyn        | 0.6  | 1.45E-02 |
| 192 | Tetraspanin (Fragment)                                                      | Tspan6     | 0.6  | 1.43E-02 |
| 193 | Carboxypeptidase E                                                          | Cpe        | 0.6  | 1.43E-02 |
| 194 | Protein Slc25a45                                                            | Slc25a45   | 0.59 | 1.38E-02 |
| 195 | Protein Sfxn2                                                               | Sfxn2      | 0.59 | 1.38E-02 |
| 196 | Phosphatidylinositol 3-kinase, catalytic, beta polypeptide                  | Pik3cb     | 0.59 | 1.35E-02 |

|     |                                                                                |           |      |          |
|-----|--------------------------------------------------------------------------------|-----------|------|----------|
| 197 | Caseinolytic peptidase B protein homolog                                       | Clpb      | 0.59 | 1.35E-02 |
| 198 | Protein LOC684828                                                              | LOC684828 | 0.59 | 1.22E-02 |
| 199 | Protein Ccm2                                                                   | Ccm2      | 0.59 | 1.21E-02 |
| 200 | Transcription factor A (Fragment)                                              | Tfa       | 0.59 | 1.18E-02 |
| 201 | Mitochondrial carnitine/acylcarnitine carrier protein                          | Slc25a20  | 0.59 | 1.17E-02 |
| 202 | Glycogen phosphorylase, brain form (Fragment)                                  | Pygb      | 0.58 | 1.11E-02 |
| 203 | Protein Kctd14                                                                 | Kctd14    | 0.58 | 1.03E-02 |
| 204 | NADPH:adrenodoxin oxidoreductase, mitochondrial                                | Fdxr      | 0.58 | 9.84E-03 |
| 205 | Nuclear factor 1                                                               | Nfic      | 0.58 | 9.76E-03 |
| 206 | RCG51933, isoform CRA_b                                                        | Tdrkh     | 0.58 | 9.68E-03 |
| 207 | Protein Mms19                                                                  | Mms19     | 0.58 | 9.45E-03 |
| 208 | Ena/VASP-like protein                                                          | Evl       | 0.57 | 8.78E-03 |
| 209 | DnaJ homolog subfamily C member 10                                             | Dnajc10   | 0.57 | 8.78E-03 |
| 210 | Component of oligomeric golgi complex 8                                        | Cog8      | 0.57 | 8.71E-03 |
| 211 | Phosphatidylinositol 5-phosphate 4-kinase type-2 beta                          | Pip4k2b   | 0.57 | 8.57E-03 |
| 212 | Histone H3                                                                     | H3f3c     | 0.57 | 8.57E-03 |
| 213 | Protein Znrf2                                                                  | Znrf2     | 0.57 | 8.36E-03 |
| 214 | Protein YIPF3                                                                  | Yipf3     | 0.57 | 8.16E-03 |
| 215 | Dynein heavy chain 12, axonemal                                                | Dnah12    | 0.57 | 7.16E-03 |
| 216 | COP9 (Constitutive photomorphogenic) homolog, subunit 5 (Arabidopsis thaliana) | Cops5     | 0.57 | 7.16E-03 |
| 217 | Protein Ltbp4                                                                  | Ltbp4     | 0.57 | 7.16E-03 |
| 218 | Carnitine O-palmitoyltransferase 2, mitochondrial                              | Cpt2      | 0.57 | 7.11E-03 |
| 219 | AP2-associated protein kinase 1                                                | Aak1      | 0.56 | 6.66E-03 |
| 220 | Protein LOC100912106                                                           | Pdcd5     | 0.56 | 5.69E-03 |
| 221 | Hematological and neurological expressed 1 protein                             | Hn1       | 0.56 | 5.65E-03 |
| 222 | Mitochondrial genome maintenance exonuclease 1                                 | Mgme1     | 0.56 | 5.55E-03 |
| 223 | Epsilon 1 globin                                                               | Hbe1      | 0.55 | 5.07E-03 |
| 224 | Probable N-acetyltransferase CML1                                              | Cml1      | 0.55 | 5.07E-03 |
| 225 | Thimet oligopeptidase                                                          | Thop1     | 0.55 | 4.91E-03 |
| 226 | Acyl-protein thioesterase 1                                                    | Lypla1    | 0.55 | 4.63E-03 |
| 227 | Synaptotagmin-like 4, isoform CRA_a                                            | Sytl4     | 0.55 | 4.48E-03 |
| 228 | Protein BUD31 homolog                                                          | Bud31     | 0.55 | 4.37E-03 |
| 229 | Brefeldin A-inhibited guanine nucleotide-exchange protein 2                    | Arfgef2   | 0.55 | 4.19E-03 |
| 230 | Probable 2-oxoglutarate dehydrogenase E1 component DHKTD1, mitochondrial       | Dhtkd1    | 0.55 | 4.19E-03 |
| 231 | Protein Def6                                                                   | Def6      | 0.55 | 4.09E-03 |
| 232 | Protein FAM136A                                                                | Fam136a   | 0.55 | 4.02E-03 |
| 233 | Mitochondrial import inner membrane translocase subunit TIM44                  | Timm44    | 0.54 | 3.52E-03 |
| 234 | Trefoil factor 2                                                               | Tff2      | 0.54 | 3.18E-03 |

|     |                                                                                    |            |      |          |
|-----|------------------------------------------------------------------------------------|------------|------|----------|
| 235 | Uroporphyrinogen decarboxylase (Fragment)                                          | Urod       | 0.54 | 3.10E-03 |
| 236 | Protein Slc25a35                                                                   | Slc25a35   | 0.54 | 3.03E-03 |
| 237 | Protein Ints3                                                                      | Ints3      | 0.53 | 2.78E-03 |
| 238 | N-acetyltransferase 9 (Predicted)                                                  | Nat9       | 0.53 | 2.76E-03 |
| 239 | WFS1                                                                               | Wfs1       | 0.53 | 2.45E-03 |
| 240 | Xaa-Pro dipeptidase                                                                | Pepd       | 0.52 | 2.11E-03 |
| 241 | Protein Phf8                                                                       | Phf8       | 0.52 | 1.87E-03 |
| 242 | Transcription elongation factor B polypeptide 3                                    | Tceb3      | 0.52 | 1.66E-03 |
| 243 | RCG40148                                                                           | Sephs2     | 0.51 | 1.34E-03 |
| 244 | Ras-related protein Rab-8B                                                         | Rab8b      | 0.5  | 1.09E-03 |
| 245 | 60S ribosomal protein L37a                                                         | Rpl37a     | 0.5  | 1.07E-03 |
| 246 | Protein Pigo                                                                       | Pigo       | 0.5  | 9.97E-04 |
| 247 | Arfaptin-1                                                                         | Arfip1     | 0.5  | 9.72E-04 |
| 248 | Uncharacterized protein                                                            |            | 0.5  | 8.55E-04 |
| 249 | Protein Cnot2                                                                      | Cnot2      | 0.49 | 7.39E-04 |
| 250 | GIMAP4                                                                             | Gimap4     | 0.49 | 7.20E-04 |
| 251 | Protein Trappc8                                                                    | Trappc8    | 0.49 | 7.20E-04 |
| 252 | ER lumen protein-retaining receptor 1                                              | Kdelr1     | 0.49 | 6.06E-04 |
| 253 | Polypeptide N-acetylgalactosaminyltransferase 13                                   | Galnt13    | 0.47 | 3.97E-04 |
| 254 | Alkaline phosphatase                                                               | Alpi       | 0.47 | 3.80E-04 |
| 255 | Uncharacterized protein                                                            |            | 0.47 | 3.64E-04 |
| 256 | Transcriptional activator protein Pur-beta                                         | Purb       | 0.47 | 3.57E-04 |
| 257 | Protein Acsm1                                                                      | Acsm1      | 0.46 | 2.61E-04 |
| 258 | Protein RGD1563714                                                                 | RGD1563714 | 0.46 | 2.27E-04 |
| 259 | Protein polyglycyclase TTL10                                                       | Ttl10      | 0.46 | 2.27E-04 |
| 260 | Flot2 protein                                                                      | Flot2      | 0.46 | 1.86E-04 |
| 261 | Protein Ganc                                                                       | Ganc       | 0.45 | 1.23E-04 |
| 262 | Protein Hccs                                                                       | Hccs       | 0.44 | 1.11E-04 |
| 263 | Putative hydrolase RBBP9                                                           | Rbbp9      | 0.44 | 1.06E-04 |
| 264 | Leucine rich repeat containing 23                                                  | Lrrc23     | 0.44 | 9.48E-05 |
| 265 | Beta-adrenergic receptor kinase 2                                                  | Adrbk2     | 0.44 | 8.54E-05 |
| 266 | alpha-1,2-Mannosidase                                                              | Man1a2     | 0.42 | 3.77E-05 |
| 267 | Elongation factor Ts, mitochondrial                                                | Tsfm       | 0.42 | 3.25E-05 |
| 268 | Protein Pla2g4d                                                                    | Pla2g4d    | 0.4  | 1.34E-05 |
| 269 | Protein Uhrf1bp1                                                                   | Uhrf1bp1   | 0.4  | 1.10E-05 |
| 270 | Phosphatidylinositol 3-kinase catalytic subunit type 3                             | Pik3c3     | 0.4  | 1.05E-05 |
| 271 | Methylmalonic aciduria (Cobalamin deficiency) cblA type (Predicted), isoform CRA_a | Mmaa       | 0.39 | 8.88E-06 |
| 272 | Protein Rnf214                                                                     | Rnf214     | 0.37 | 2.63E-06 |
| 273 | Translation initiation factor eIF-2B subunit gamma                                 | Eif2b3     | 0.37 | 2.50E-06 |
| 274 | PR domain zinc finger protein 2                                                    | Prdm2      | 0.37 | 1.71E-06 |
| 275 | UDP-glucuronosyltransferase 2B37                                                   | Ugt2b37    | 0.35 | 7.69E-07 |
| 276 | Bridging integrator 2                                                              | Bin2       | 0.35 | 4.16E-07 |

|     |                                                                    |          |      |          |
|-----|--------------------------------------------------------------------|----------|------|----------|
| 277 | Enhancer of rudimentary homolog                                    | Erh      | 0.34 | 3.68E-07 |
| 278 | FACT complex subunit SSRP1                                         | Ssrp1    | 0.34 | 2.18E-07 |
| 279 | Protein Arhgap21                                                   | Arhgap21 | 0.34 | 1.78E-07 |
| 280 | ATP-binding cassette, sub-family B (MDR/TAP),<br>member 10         | Abcb10   | 0.31 | 2.50E-08 |
| 281 | Epidermal growth factor receptor pathway substrate<br>15 isoform B | Eps15    | 0.3  | 7.58E-09 |
| 282 | Protein Slc37a1                                                    | Slc37a1  | 0.25 | 6.28E-11 |
| 283 | Protein Kel                                                        | Kel      | 0.22 | 2.07E-13 |
| 284 | A1b (Fragment)                                                     | RT1-A1b  | 0.18 | 2.69E-16 |
| 285 | ATP-binding cassette, sub-family D (ALD),<br>member 1 (Predicted)  | Abcd1    | 0.18 | 9.13E-17 |



**Supplemental Table 2. The differentially expressed proteins from rat pancreas identified by proteomics (Emodin vs. SAP)**

| No. | Protein name                                                    | Gene name | ratio | pI value |
|-----|-----------------------------------------------------------------|-----------|-------|----------|
| 1   | Serum albumin                                                   | Alb       | 0.29  | 1.33E-17 |
| 2   | Protein Hectd3                                                  | Hectd3    | 0.30  | 9.72E-17 |
| 3   | Cct-5 protein (Fragment) ]                                      | Cct5      | 0.32  | 3.12E-15 |
| 4   | Protein Dpy19l2                                                 | Dpy19l2   | 0.33  | 1.67E-14 |
| 5   | Protein Ppp6r2                                                  | Ppp6r2    | 0.46  | 6.38E-08 |
| 6   | Protein Fn3k                                                    | Fn3k      | 0.47  | 1.45E-07 |
| 7   | Glucagon                                                        | Gcg       | 0.48  | 2.34E-07 |
| 8   | Metallothionein                                                 | Mt1m      | 0.48  | 3.71E-07 |
| 9   | Small integral membrane protein 14                              | Smim14    | 0.48  | 4.01E-07 |
| 10  | Beta-enolase                                                    | Eno3      | 0.49  | 7.80E-07 |
| 11  | Phosphoglycerate mutase 2                                       | Pgam2     | 0.50  | 1.58E-06 |
| 12  | Ppp4r2 protein                                                  | Ppp4r2    | 0.50  | 1.70E-06 |
| 13  | Creatine kinase M-type                                          | Ckm       | 0.51  | 1.95E-06 |
| 14  | Protein Nudcd1                                                  | Nudcd1    | 0.52  | 3.55E-06 |
| 15  | Hemoglobin subunit alpha-1/2                                    | Hba1      | 0.53  | 8.61E-06 |
| 16  | Ubiquitin carboxyl-terminal hydrolase 16                        | Usp16     | 0.53  | 1.03E-05 |
| 17  | Redox-regulatory protein FAM213A                                | Fam213a   | 0.54  | 1.39E-05 |
| 18  | Insulin-1                                                       | Ins1      | 0.54  | 1.39E-05 |
| 19  | Hypothetical LOC498675                                          | LOC498675 | 0.56  | 5.93E-05 |
| 20  | Oligosaccharyltransferase complex subunit OSTC                  | Ostc      | 0.57  | 7.69E-05 |
| 21  | Claudin-3                                                       | Cldn3     | 0.57  | 7.69E-05 |
| 22  | Metallothionein 1 (Fragments)                                   | Mt1f      | 0.57  | 8.09E-05 |
| 23  | Protein Fam195a                                                 | Fam195a   | 0.57  | 8.09E-05 |
| 24  | Charged multivesicular body protein 4c                          | Chmp4c    | 0.57  | 1.04E-04 |
| 25  | Protein Kctd18                                                  | Kctd18    | 0.58  | 1.70E-04 |
| 26  | Protein Mdn1                                                    | Mdn1      | 0.58  | 1.78E-04 |
| 27  | Serine/threonine-protein kinase MAK                             | Mak       | 0.59  | 1.96E-04 |
| 28  | Succinyl-CoA:3-ketoacid coenzyme A transferase 1, mitochondrial | Oxct1     | 0.59  | 2.05E-04 |
| 29  | Eukaryotic translation initiation factor 4E-binding protein 1   | Eif4ebp1  | 0.59  | 2.25E-04 |
| 30  | Protein Edrf1                                                   | Edrf1     | 0.59  | 2.58E-04 |
| 31  | Protein Myh1                                                    | Myh1      | 0.59  | 2.58E-04 |
| 32  | Ras-related protein Ral-B                                       | Ralb      | 0.59  | 2.70E-04 |
| 33  | Rho GTPase-activating protein 17                                | Arhgap17  | 0.60  | 3.39E-04 |
| 34  | Serine protease inhibitor Kazal-type 3                          | Spink3    | 0.60  | 4.41E-04 |
| 35  | Protein Neb                                                     | Neb       | 0.61  | 6.20E-04 |
| 36  | Kng2 protein                                                    | Kng2      | 0.62  | 6.73E-04 |
| 37  | Lethal(3)malignant brain tumor-like protein 1                   | L3mbtl1   | 0.62  | 1.01E-03 |

|    |                                                                 |          |      |          |
|----|-----------------------------------------------------------------|----------|------|----------|
| 38 | Anoctamin                                                       | Ano6     | 0.64 | 1.79E-03 |
| 39 | UV-stimulated scaffold protein A                                | Uvssa    | 0.64 | 1.86E-03 |
| 40 | Aldehyde dehydrogenase (NAD),<br>cytosolic (Fragments)          |          | 0.64 | 1.86E-03 |
| 41 | Protein Adgrl1                                                  | Adgrl1   | 0.64 | 1.86E-03 |
| 42 | Cytochrome c oxidase subunit 6C-1                               | Cox6c1   | 0.64 | 1.93E-03 |
| 43 | Truncated alpha-actinin                                         |          | 0.65 | 2.15E-03 |
| 44 | Serine protease HTRA1                                           | Htra1    | 0.65 | 2.23E-03 |
| 45 | DNA topoisomerase 1                                             | Top1     | 0.65 | 2.57E-03 |
| 46 | DnaJ (Hsp40) homolog, subfamily B,<br>member 12                 | Dnajb12  | 0.65 | 2.96E-03 |
| 47 | Uncharacterized protein                                         | Chmp4b   | 0.65 | 2.96E-03 |
| 48 | CTTNBP2 N-terminal like (Predicted),<br>isoform CRA_a           | Ctnbp2nl | 0.66 | 3.28E-03 |
| 49 | Platelet glycoprotein Ib beta chain                             | Sept5    | 0.66 | 3.51E-03 |
| 50 | Chloride intracellular channel protein                          | Clic4    | 0.66 | 3.63E-03 |
| 51 | Protein Sh3d19                                                  | Sh3d19   | 0.66 | 3.63E-03 |
| 52 | Leucine-rich repeat-containing G protein-<br>coupled receptor 8 | Rxfp2    | 0.66 | 3.89E-03 |
| 53 | Protein Hbb-b1                                                  | Hbb-b1   | 0.66 | 4.02E-03 |
| 54 | Platelet endothelial cell adhesion<br>molecule                  | Pecam1   | 0.66 | 4.02E-03 |
| 55 | Protein Cobll1                                                  | Cobll1   | 0.66 | 4.15E-03 |
| 56 | Mitochondrial ribosomal protein S5<br>(Predicted)               | Mrps5    | 0.67 | 4.29E-03 |
| 57 | Phospholemman                                                   | Fxyd1    | 0.67 | 4.44E-03 |
| 58 | Secernin-1                                                      | Scrn1    | 0.67 | 4.44E-03 |
| 59 | Transcription elongation factor B<br>polypeptide 2              | Tceb2    | 0.67 | 4.59E-03 |
| 60 | DnaJ homolog subfamily A member 2                               | Dnaja2   | 0.67 | 4.59E-03 |
| 61 | Interferon regulatory factor 6 (Predicted)                      | Irf6     | 0.67 | 4.74E-03 |
| 62 | Protein Mcpt113                                                 | Mcpt113  | 1.50 | 1.60E-02 |
| 63 | Complement C1q subcomponent subunit<br>B                        | C1qb     | 1.51 | 1.48E-02 |
| 64 | Complement component C6                                         | C6       | 1.51 | 1.45E-02 |
| 65 | Uncharacterized protein                                         |          | 1.52 | 1.39E-02 |
| 66 | Protein Tmem160                                                 | Tmem160  | 1.52 | 1.36E-02 |
| 67 | Protein Ighm                                                    | Ighm     | 1.52 | 1.36E-02 |
| 68 | Protein Carns1                                                  | Carns1   | 1.52 | 1.36E-02 |
| 69 | Usher syndrome type-1C protein-binding<br>protein 1             | Ushbp1   | 1.52 | 1.34E-02 |
| 70 | Protein Snw1                                                    | Snw1     | 1.52 | 1.33E-02 |
| 71 | Protein Saysd1                                                  | Saysd1   | 1.52 | 1.30E-02 |
| 72 | Protein Sec61b                                                  | Sec61b   | 1.52 | 1.30E-02 |

|     |                                                                     |           |      |          |
|-----|---------------------------------------------------------------------|-----------|------|----------|
| 73  | Aspartyl aminopeptidase                                             | Dnpep     | 1.53 | 1.23E-02 |
| 74  | Dipeptidyl peptidase 1                                              | Ctsc      | 1.53 | 1.22E-02 |
| 75  | Retinol-binding protein 4                                           | Rbp4      | 1.53 | 1.22E-02 |
| 76  | Protein Cyfip2                                                      | Cyfip2    | 1.53 | 1.17E-02 |
| 77  | Hematological and neurological<br>expressed 1 protein               | Hn1       | 1.53 | 1.17E-02 |
| 78  | Protein F13b                                                        | F13b      | 1.54 | 1.09E-02 |
| 79  | Family with sequence similarity 49,<br>member A                     | Fam49a    | 1.55 | 9.99E-03 |
| 80  | Uncharacterized protein                                             |           | 1.55 | 9.99E-03 |
| 81  | Actin, cytoplasmic 1                                                | Actb      | 1.56 | 8.17E-03 |
| 82  | Epidermal growth factor receptor<br>pathway substrate 15 isoform B  | Eps15     | 1.57 | 8.17E-03 |
| 83  | Coactosin-like protein                                              | Cotl1     | 1.57 | 7.90E-03 |
| 84  | Alpha-1-inhibitor 3                                                 | A1i3      | 1.57 | 7.81E-03 |
| 85  | ORM1-like 2 ( <i>S. cerevisiae</i> ) (Predicted),<br>isoform CRA_a  | Ormdl2    | 1.57 | 7.81E-03 |
| 86  | Protein Sfn                                                         | Sfn       | 1.57 | 7.30E-03 |
| 87  | Prostate leucine zipper variant 2                                   | PrLZ      | 1.58 | 6.75E-03 |
| 88  | Protein Mms19                                                       | Mms19     | 1.59 | 6.53E-03 |
| 89  | Immunoglobulin joining chain                                        | Igj       | 1.59 | 5.89E-03 |
| 90  | Afamin                                                              | Afm       | 1.60 | 5.83E-03 |
| 91  | Protein Pml                                                         | Pml       | 1.60 | 5.57E-03 |
| 92  | Cleavage and polyadenylation specificity<br>factor 3, isoform CRA_a | Cpsf3     | 1.61 | 4.85E-03 |
| 93  | Uncharacterized protein                                             |           | 1.61 | 4.85E-03 |
| 94  | Proteasome activator complex subunit 2                              | Psme2     | 1.62 | 4.58E-03 |
| 95  | Protein Plekho2                                                     | Plekho2   | 1.62 | 4.58E-03 |
| 96  | Collagen alpha-1(II) chain                                          | Col2a1    | 1.62 | 4.53E-03 |
| 97  | Protein Hgd                                                         | Hgd       | 1.63 | 3.68E-03 |
| 98  | Alpha-2-HS-glycoprotein                                             | Ahsg      | 1.64 | 3.43E-03 |
| 99  | Uncharacterized protein                                             |           | 1.65 | 2.98E-03 |
| 100 | PR domain zinc finger protein 2                                     | Prdm2     | 1.65 | 2.92E-03 |
| 101 | Protein LOC299282                                                   | LOC299282 | 1.66 | 2.88E-03 |
| 102 | Uncharacterized protein                                             | Ighv7-1   | 1.67 | 2.45E-03 |
| 103 | L-lactate dehydrogenase B chain                                     | Ldhb      | 1.68 | 2.23E-03 |
| 104 | Uncharacterized protein                                             |           | 1.70 | 1.76E-03 |
| 105 | Uncharacterized protein                                             |           | 1.70 | 1.62E-03 |
| 106 | Apolipoprotein B-100                                                | Apob      | 1.71 | 1.58E-03 |
| 107 | Transcriptional activator protein Pur-beta                          | Purb      | 1.72 | 1.30E-03 |
| 108 | Uncharacterized protein                                             | Ighv7-1   | 1.72 | 1.30E-03 |
| 109 | Attractin                                                           | Atrn      | 1.73 | 1.27E-03 |
| 110 | Protein AMBP                                                        | Ambp      | 1.73 | 1.23E-03 |
| 111 | Trypsin-4                                                           | Try4      | 1.74 | 1.11E-03 |

|     |                                                        |              |      |          |
|-----|--------------------------------------------------------|--------------|------|----------|
| 112 | 40S ribosomal protein S30                              | Fau          | 1.74 | 1.04E-03 |
| 113 | Protein Zfp512                                         | Zfp512       | 1.76 | 8.44E-04 |
| 114 | Islet cell autoantigen 1                               | Ica1         | 1.76 | 7.94E-04 |
| 115 | Nuclear cap-binding protein subunit 2                  | Ncbp2        | 1.76 | 7.94E-04 |
| 116 | Serum paraoxonase/arylesterase 1                       | Pon1         | 1.77 | 6.95E-04 |
| 117 | Protein Alms1                                          | Alms1        | 1.80 | 5.31E-04 |
| 118 | Protein LOC100362109                                   | LOC100362109 | 1.83 | 3.62E-04 |
| 119 | Synaptic vesicle 2-related protein                     | Svop         | 1.84 | 3.08E-04 |
| 120 | T-cell surface glycoprotein CD4                        | Cd4          | 1.85 | 2.76E-04 |
| 121 | 60S ribosomal protein L36a                             | Rpl36a       | 1.85 | 2.72E-04 |
| 122 | Carboxylesterase 1C                                    | Ces1c        | 1.86 | 2.34E-04 |
| 123 | Uncharacterized protein                                | Phf11b       | 1.89 | 1.59E-04 |
| 124 | Proteasome subunit beta type-10                        | Psmb10       | 1.92 | 1.16E-04 |
| 125 | Uncharacterized protein                                |              | 1.93 | 9.48E-05 |
| 126 | Protein Zfp318                                         | Zfp318       | 1.95 | 8.35E-05 |
| 127 | Kelch domain-containing protein 2                      | Klhdc2       | 1.95 | 8.14E-05 |
| 128 | Transcription factor BTF3                              | Btf3         | 1.95 | 8.03E-05 |
| 129 | Protein Arhgap25                                       | Arhgap25     | 1.96 | 7.26E-05 |
| 130 | Synaptogyrin-2                                         | Syngr2       | 1.96 | 7.08E-05 |
| 131 | Calpain small subunit 1                                | Capns1       | 1.96 | 6.56E-05 |
| 132 | Protein LOC684828                                      | LOC684828    | 2.01 | 3.46E-05 |
| 133 | Coronin-1A                                             | Coro1a       | 2.04 | 2.64E-05 |
| 134 | Uncharacterized protein                                |              | 2.05 | 2.15E-05 |
| 135 | Uncharacterized protein                                |              | 2.06 | 1.94E-05 |
| 136 | Uncharacterized protein                                | LOC100911313 | 2.07 | 1.66E-05 |
| 137 | ATP synthase F(0) complex subunit C1,<br>mitochondrial | Atp5g1       | 2.07 | 1.62E-05 |
| 138 | LIM domain-containing protein 2                        | Limd2        | 2.08 | 1.46E-05 |
| 139 | 60S ribosomal protein L36                              | LOC100360439 | 2.10 | 1.21E-05 |
| 140 | Adenylate cyclase 9 (Predicted), isoform<br>CRA_b      | Adcy9        | 2.10 | 1.11E-05 |
| 141 | 60S ribosomal protein L29                              | Rpl29        | 2.11 | 9.37E-06 |
| 142 | Ig kappa chain V region S211                           |              | 2.12 | 8.67E-06 |
| 143 | Uncharacterized protein                                |              | 2.12 | 8.33E-06 |
| 144 | MHC class II antigen RT1.B beta chain<br>(Fragment)    |              | 2.15 | 6.17E-06 |
| 145 | Protein Vom1r103                                       | Vom1r103     | 2.20 | 3.30E-06 |
| 146 | Histone H1.4                                           | Hist1h1e     | 2.20 | 2.93E-06 |
| 147 | Uncharacterized protein                                |              | 2.21 | 2.60E-06 |
| 148 | Protein Lin28b                                         | Lin28b       | 2.24 | 1.78E-06 |
| 149 | Ribosomal protein L37                                  | LOC100360654 | 2.28 | 1.04E-06 |
| 150 | Keratin, type II cytoskeletal 2 epidermal              | Krt2         | 2.30 | 7.85E-07 |
| 151 | Arylsulfatase E                                        | Arse         | 2.34 | 5.01E-07 |
| 152 | Protein LOC681918                                      | LOC686074    | 2.38 | 2.95E-07 |

|     |                                                           |           |      |          |
|-----|-----------------------------------------------------------|-----------|------|----------|
| 153 | Signaling threshold-regulating<br>transmembrane adapter 1 | Sit1      | 2.49 | 7.05E-08 |
| 154 | Ena/VASP-like protein                                     | Evl       | 2.60 | 1.53E-08 |
| 155 | Serum albumin                                             | Alb       | 2.61 | 1.43E-08 |
| 156 | Carboxylic ester hydrolase                                | Ces1d     | 2.63 | 9.74E-09 |
| 157 | Trefoil factor 2                                          | Tff2      | 2.65 | 8.09E-09 |
| 158 | Protein Rab30                                             | Rab30     | 2.68 | 5.22E-09 |
| 159 | Histone H3                                                | Hist2h3c2 | 2.71 | 3.70E-09 |
| 160 | Protein LOC684681                                         | LOC684681 | 2.76 | 1.81E-09 |
| 161 | Dynein heavy chain 12, axonemal                           | Dnah12    | 2.99 | 8.76E-11 |
| 162 | Histone H4                                                | Hist1h4b  | 3.00 | 7.29E-11 |
| 163 | Leukocyte common antigen                                  | Ptprc     | 3.05 | 4.04E-11 |
| 164 | GIMAP4                                                    | Gimap4    | 3.16 | 9.69E-12 |
| 165 | Protein Slc37a1                                           | Slc37a1   | 3.87 | 1.10E-15 |
| 166 | Histone H1.1                                              | Hist1h1a  | 4.88 | 5.83E-21 |
| 167 | Protein Kel                                               | Kel       | 8.22 | 9.19E-36 |

**Supplemental Table 3.** Histological scoring for acute pancreatitis.

| Condition         | Score | Description                                 |
|-------------------|-------|---------------------------------------------|
| Edema             | 0     | Absent                                      |
|                   | 1     | Diffuse expansion of interlobular septa     |
|                   | 2     | 1 + diffuse expansion of interlobular septa |
|                   | 3     | 2 + diffuse expansion of interlobular septa |
| Inflammation (%)  | 0     | Absent                                      |
|                   | 1     | In parenchyma (< 50 of lobules)             |
|                   | 2     | In parenchyma (51-75 of lobules)            |
|                   | 3     | In parenchyma (> 75 of lobules)             |
| Vacuolization (%) | 0     | Absent                                      |
|                   | 1     | Focal (5-20)                                |
|                   | 2     | Diffuse (21-50)                             |
|                   | 3     | Severe (> 50)                               |

**Supplemental Table 4. The primer sequences used for real-time PCR assay**

| Gene          | GenBank accession | Primers (5'-3')                                                         |
|---------------|-------------------|-------------------------------------------------------------------------|
| IL-6          | NM_012589.2       | Forward: CTGATTGTATGAACAGCGATGATG<br>Reverse: GG TAGAAACGGAACTCCAGAAGAC |
| IL-1 $\beta$  | NM_012589.2       | Forward: TCAGGAAGGCAGTGTCACTCA<br>Reverse: CATCATCCCACGAGTCACAGA        |
| TNF- $\alpha$ | NM_012675.3       | Forward: CAAGAGCCCTTGCCCTAAGG<br>Reverse: CGGACTCCGTGATGTCTAAGTACTT     |
